# Supplementary material for: High stresses stored in fault zones: example of the Nojima fault (Japan)
Source: Copernicus journal article supplement (doi:10.5194/se-2017-130), 2017-12-14
Supplement: Supplementary file [file se-2017-130-RC1-supplement.pdf]

### **Technical comments**

In general, the authors use long and often complicated sentences. Although this is a matter of style of course, it does create some hard-to-follow lines of text. Examples are line 30-32, page 11, line 5-8, page 12, and line 10-13, page 12. I recommend the authors to carefully read through the text again and split some of these sentences in two. Often, it is only a matter of changing a few words or replacing a comma with a dot. Further technical comments are:

- Line 31, page 2: Please remove *Actually and*
- Line 1, page 3: Add *off-fault* between *co-seismic damage*.
- Line 9, page 3: Replace *brought to the near surface* with *exhumed*?
- Line 22, page 3: Add *the* between *almost entire*.
- Line 22, page 3: Replace *due to the cohesion* by *,thanks to the cohesion of*
- Line 26, page 3: Replace *was characterized by* *is evidenced*
- Line 27, page 3: Add *of the fractures* after *main sealing mineral*.
- Line 28, page 3: Replace *(Cho et al., 1987), which* by *(Cho et al., 1987). This*
- Line 13, page 4: Replace *thin (100 μm thick) sections* by *thin sections (100 μm thick)*
- Line 5, page 5: Replace *is* by *was*.
- Line 6, page 5: Replace *are* by *were*.
- Line 7, page 6: At the description of the intragranular microfractures oriented at 50°N, maybe add that this direction is also independent from crystallographic orientation (similar to line 14 in the same section).
- Line 18, page 6: Reference?
- Line 20, page 6: Reference?
- Line 30, page 8: I recommend not to use the term *experimental* here, it implies experimental work. Replace by for instance: *measured*
- Line 17, page 10: remove comma after *thus*.
- Line 27, page 10: Change *sriking* into *striking*
- Line 26, page 11: Replace *actually* by *even more*
- Line 5, page 12: Replace *alteratively* by *alternatively*
- Line 33, page 14: Replace *and* between the Aben and Dor references by a comma.
- Line 27, page 15: Do the authors mean dissolution-precipitation processes?
- Figure 13b: I recommend changing the x-axis labels to 100, 200, etc. for clarity.
- Figure 1: It might be useful to add a little map of Japan as a large-scale reference. Also, add the name Ryoke to the granitoids in the legend.
